# Supplementary material for: Diversity and evolution of mariner-like elements in aphid genomes
Source: PubMed Central journal article supplement (PMC5490172; doi:10.1186/s12864-017-3856-6), 2017-06-29
Supplement: 12864_2017_3856_MOESM1_ESM.pdf [file 12864_2017_3856_MOESM1_ESM.pdf]

**Additional file 1. *mariner and rosa* transposases sequences used as queries in the tBLASTN search (Species, Clades, Accession number).**

| Transposase | Species                          | Clades          |                   | Accession number |
|-------------|----------------------------------|-----------------|-------------------|------------------|
|             |                                  | Catalytic motif | ID name           |                  |
| Cbmar1      | <i>Caenorhabditis briggsae</i>   |                 | <i>briggsae</i>   | AC099767         |
| Avamar      | <i>Adineta vaga</i>              |                 | <i>elegans</i>    | AAZ67106.1       |
| Cemar1      | <i>C. elegans</i>                |                 |                   | NP497120.1       |
| Gtmar1      | <i>Girardia tigrina</i>          |                 | <i>cecropia</i>   | CAA56763.1       |
| Hsmar1      | <i>Homo sapiens</i>              |                 |                   | U52077           |
| Bytmar      | <i>Bythograea therydron</i>      |                 |                   | CAD45367.1       |
| Cpmar1      | <i>Chrysoperla plorabunda</i>    |                 |                   | AAA28265.1       |
| Fungia      | <i>Fungia sp. Kusabiraishi</i>   |                 |                   | BAB32436.1       |
| Himar1      | <i>Haematobia irritans</i>       | DD34D           | <i>irritans</i>   | U11642           |
| Hsmar2      | <i>H. sapiens</i>                |                 |                   | AAC52011.1       |
| Rfmar       | <i>Rhinolophus ferrumequinum</i> |                 |                   | AC157888         |
| Ammar       | <i>Apis mellifera</i>            |                 | <i>mellifera</i>  | AY155490         |
| Ccmar2      | <i>Ceratitis capitata</i>        |                 |                   | AAO12864         |
| Famar1      | <i>Forficula auricularia</i>     |                 |                   | AY155492         |
| Desmar1     | <i>Mayetiola destructor</i>      |                 |                   | U24436           |
| Mboumar     | <i>Messor bouvieri</i>           |                 | <i>mauritiana</i> | AJ781769         |
| Mos1        | <i>Drosophila mauritiana</i>     |                 |                   | X78906           |
| Crmar2      | <i>Ceratitis rosa</i>            | DD41D           | <i>rosa</i>       | AAK61417.1       |
