# Supplementary material for: Diversity and evolution of mariner-like elements in aphid genomes
Source: PubMed Central journal article supplement (PMC5490172; doi:10.1186/s12864-017-3856-6), 2017-06-29
Supplement: 12864_2017_3856_MOESM2_ESM.pdf [file 12864_2017_3856_MOESM2_ESM.pdf]

**Additional file 2. Amino acid sequences of the transposase of the 15 complete elements.** The three aspartic residues of the catalytic domain are marked in red, the sequences related to the WPHL-specific motif of the DNA binding domain are indicated in black bold as well as the helix turn helix (HTH) region (underlined) and the NLS (in blue). Stop codons are represented by asterisks (\*).

#### **Apismar1.1**

MSIESAAKCEIRAVIRYLVAAKEKSPHEIFNEVRTVYEGGHMNRTSVYKWCREFKNDRTNVHDDLRSGRPSILTDD  
IVKKSRRMFVDRRLTLDEL SAMFPQLSRSL LHETITETLGFHKL CAR**WV**PKQL****TEQHMLNVRVQASREFFLERYELD  
GDNFLKSIIVTGN**ETWVAHYTPETKRQSEQWRHTTS****PST**KKFN****TTISAKKIMASVFWDHKGIILIEYLPQGETINA  
ARYCETLKKLRRAIQNKRRGLLTSQVCLLH**DNARPH**TANVTQQLLDSFGWDVNLNHTPYSPDLAPS**DY**HLF TSLKK  
HMGGKFSAD EEVKGAVDKWTKEMAAEFYEAGIKKLCRLTTCIERNGDYVEK

#### **Apismar1.2**

MSAIVAAPASCEVRTVIRFLCAKRSSAAEIHGELCLAYGLTVMSEGKIRWCRDFKNGRTNVHDEERSGRPSMQTD  
EIVSLVDQKLRFDCLRTISALADEFPNLARTTVYTIITEKLGYHKLYAR**WV**PKML****TDQHKEQRIMSSGREFLNRY  
RQDGDNLFSHIVTGD**GTWISYINPETKQSQMQWRHSTS****PK**QKFK****QTPYTSRKMMATVFWDEKSVLLVDFMERGT  
TITAQVYCETLNKLRCAIQNRRRGKLSSSIILLH**DNARPH**TAAKTQEKIDFR\*ELFNHPLYSPDLVPS**DY**FLFFH  
FKKWLVGQRFENDKELNAVENWFNSQAANFYADGLRKLKLVKRYEKCFEINGNYVEK

#### **Dnomar1.1**

MSIESATMCEIRAVIRYLDAAKEKSP\*GIFNEVRTTYIEGNNINRNTSVYKWCREFKNNRTNVHDDLRSGRPSVLT  
DIVKKVENAVCDRRLTLDEL SAIFPQLPRSLIHETITETLGFHKL CAR**WV**PKQL****TDQHMLNVRVQASREFFLERYE  
LDGDNFLKSIITE**DETWVAHYTLET**KRQSEQWHHTTS**PST**KKFK****TTISAKKIMALVFWDHKGIIFIKYLPQGETI  
NAARYFETLKKLRRAIQNKRRGLLTSQDCLRLH**DN**TKPHMANVSKQLLDSFGWDVNLNHPYSPDLAPS**DY**HFFT  
SLKKLVGKFFSTDEEVKGAVDKWTKVYFYGAGIKKFCCLITCI\*RDGDYAEK

#### **Dnomar1.2**

MSTIIPAPTSCEIRAVIRFLCAKRSSAAEIHQELFLVYGPVMSEGKIRQWCRDLKNGRTNVHSMQTD EIVSLMD  
QKPRNRRLLTSTLAD EFPNL\*RTIVYTIIVTEKLGYHKLCAR**W**LPKML****TDQHQE\***RITSG\*EFLIHYRQDGDNL**F  
SHIATG**Y**ETWISYINPETKQSQMQWRSTSSK**PK**FK****PTPCTSRKMIATVFWDEKGVLLVDFMERGTTITAEVYC  
ETLNKLRRAIQN\***RSKG\*SGIILR****DNARPH**TAAKTQEKIQDFRWKLLNHPYSTDLAPS**DY**FLFLHFKKWLGEQR  
FENDKELKNAVENWFKSQNEFYTDELRLKLVKWEKCLEVNGDYVEK

#### **Mpmar1.1**

MSIESAAKCEIRAVIRYLVAAKEKSPHEIFNEVRTVYEGGHMNRTSVYKWCREFKIGCTNVHDDLRSGRPSILTDD  
IVKIVENAVRDRRLTLDEL SAMFPQLSRSL LHETITETLGFHKL CAR**WV**PKQL****TEQHMLNVRVQASREFFLERYEL  
DGDNLFLKSIIVTGD**DETWVAHYTPETKQSEQWRHTTS****PST**KKFK****TTISAKKIMASVFWDLKGIILIEYLPQGETIN  
AARYCETLKKLRRAIQNKRRGLLTSQVCLLH**DNARPH**TANVTQQLLDSFGWDVNLNHPYSPDLAHS**DY**HLF TSLK  
KHMGGKFSAD EEVKGAVDKWTKEMAAEFYEAGIKKLCRLTTCIERNGDYVEK

#### **Apismar2.1**

MLDIKIEQRVNIKFLVKKLKTAAESFRMLCEVYGEELSRARVFEWHKRFCSGREDVEDDDRSEPTTSSTNENV  
EKIDKIRQDRRLSVRAVAEMVNIDRESVRKILVENLNMMKVCAM**V**PKNL****TIDQKFNKEICSDTLKIKDDPS  
FINNIITC**DET**WIFTYDPET**KRQSMHWKTPTS****PRMK**KARMSKSKFKAMLIVFFDIKGIIFVEWVPSGQTVNQYYY  
KEVLIKLRERV**RKKRP**DLWKNWVLHQ**DN**APAHSAFSIQRYLTEKKISVLQHPPYSPDLAPC**D**FFLFPKIKSLK  
GTHFQTVDVVKMKTAE LLKGLNESDWQHCFQEWQRRMQQCIDAEGRYFEGDNH

#### **Apismar2.2**

MDNITEQRACFKFCISKGNATETLELIKLAFGDVLSRCVTFDWFRRSKEGRISIEDDYRPGRPSSSKTNDTID  
LVRNKIRNYRRLTVREVANEVGISIGTCHSILSDEL SMKRVSAK**LL**PKTEE****QMEHRIEVCLELKNRVSNDPNFIK  
SIITG**DET**WVYGYDPKTKVQSSQWKTANSSR**PK**KCRQ****IRSNIKAMLIVFFDFGLVHYEFVPTGQTINQVYK\*V  
VLKRLREKVC**RKRPE**VWKSWSWFLH**DN**APAHSAFSIREFLASKNIPVVPHPYSPDLAPC**D**FFLFPRLKSTLKG  
HRFVDVNETIHNATQELKAITMKEIQRCFKKWQDRWDHCIEAKGHYFEGDPFK

#### **Dnomar2.1**

MLGIKFEQR\*NIKFFCEIKKIAVESFHILCEFYGEERLSRVCVFELHKERM SKMMIVLDVLRPTTPSTNENVEK  
IDTIIRK\***RRLSVRAVTE**MVNIDRESVRKILVENLNMMKCAK**W**SLKSL****TVDQKFNKEICSDTLKIKDDPSFI  
NNIITC**DET**CIIFTYDTETKRQSMHWKTVRHQVQSQE\***RKHE\*TSQNSKQFSLFSLTLRE\*LFLEWVPSGQTVYQYY**  
CKEILIKLKEHIRK\***LNLWKNWVLHQ****DN**APAHSAFSIQRFLETKNIFILQHPPYSPDFTPC**D**FFLF SKIKSL  
KNGTNNFQTVDDVKM\***TAELLKGLTESDWQYCFQEWQRRMQQCVDDE\*RYFEGDNH**

#### **Dnomar2.2**

MEELKSQRIFIKFCVKNEIKCSKVCELLQKAYGESAMKKTIVNEWYKRYQDGRKDVEDDKRSGRPSTSIIDANVK  
KVEKMOVNDRRITIIIEVADEVGISIVSQNIFSNVGLGRVA**AK**FIPKLL****NFDQKNNRMNVAQELLNDVNVDP  
LLERVITS**DET**WVYGYEVETKAQSSTWKHSTS**PRAKKARQV**RSNVKVLVTFVDFNGIVHQEF LPQGRTVNKEYY  
LEV MRRLREAIRKKRPDIWKNNSWLLH**DN**APAHSSLLVHNFLAKNNTAVMPQPPYSPDMAFCAFFLF PMLKRHM  
KGQRFSSIEEIKAESLRVLKDMPKSEYQECFEDWKKS LA

**Dnomar3.1**

MESIITAPSDVRFKQRAVIEFLVAENVKPVDIHRRL LAVYGNQTL DVSSVRRWALRVKGESEVGKAIITDQDRSGR  
PVTVTDEGLVTRPIKQKVDDLVKGNRRIKQSEIAIALGISKERVQHILCELEYRKICTRWV**PKML**TEEMKQNRVE  
ICRQLLLRLNVRENFLNIMVTG**DES**WVHHYGPENKRQSMEFRHKTS**PA****PKKFKV**QASAGKVMLTVFWDSKGVHT  
EYLEKGSTINSIRYIEALKKLLKKRIKRVRNLTQFLLHH**D**NARPHCSRATMTAIESLGFQVIPHPPYSPDLAP**CD**  
FFLFPKLKEHLKGTKFNSDEKVKAEVKRWFNAQPEEFYLNIGISKLVNRWQKCI ALEGSYVEK

**Apismar4.1**

MERYKSQQRVLIKTHYQNGEHYAVTVRKLRTILGHHNAPNESTVRRLIKKFEESGSTQDKKISGRHRSRSEAN  
VTVVHDSVTVSPRKSCRRRAQEMHMSPATMQRILTKDLHLHAYKV**QLTQELK**PADHEKRRQFVEWILTRDRESEG  
FAKRIIFT**DE**AHFHLNGFVNKQNCRIWSENPRITQEKEMHPERVTVWCGIWSGGLIGPYFFEDEEGNAVTVNGV  
RYRAMLNHFLWPRLDQMNIEVWFQ**QD**GATCHTSRETIALLEKFPDTLISLRGDQSYPPRSCDLTP**CD**FFLWGY  
TKSRVYQNKVRNVLELQEI RCVLNELDGAMCDRVMVNFMERIIAYRASRGGHMPDVVFHC

**Apismar4.2**

gMNGYSVEQVRRIKFFYYQNQCSVRETFRAFTDFYPRHNRPAESTIRRLVAKF\*STGSINYQPTPIRQRNARSIE  
NIAAVRDSVRENPRQ\*IPRRSQELGLSVTSTWRILRRDLGLHPYKI**QLTQALK**VNDHTQRRVFADWVLGQLAVDP  
NFAKKIIFS**DE**AHFWMNGYVNKQNCRIWDDTNPHKTHQNKMPPEEVTVWCGFWSGGIIGPYFFQNETGIAITVNG  
ERYRSMINFFWPKLDDMDTEDMWFQ**QD**GATCHTARATMDILRERFEGMVISRNGDINWPPRSCDLTP**LD**FFLWG  
YLKSQVYANKPQTIDALKVNIINTIKKIQPDCNKVIENWTTIRIRATKQSRGGHLNDVIFHK

**Apismar4.3**

MVWTGVHRSFVVRAYYENNHSLIATQRAFRIHFGIPRNESIPSANTIKFWIRQLEETGSTLSELGHGAPRTVTRTP  
ENVQLVRESIEQSPTRSARKHAVALGISVRSRRLRILHEYLSFHPYK**MLVQELH**ATDYDNRKNLCQQILLRIPPT  
STFFCS**DE**AHFHLSGTVNKQNFYWAANNPQQLHERPLHSPKVTVWCGVSOFGVIGPYFFEDENRTVIVTPGRYV  
VMLETYLQQRLEEMA EYHNLENVWFQ**QD**GATAHTAQISLGVLQOMFPGRVLVSLRGDIGWPARSPDLSM**CD**FFLWG  
YLKDKVFRHRPHTIEDLKQKITEEIEAIPVETCRKSYESFRDRLQCCIDADGRHHRDIISKQ

**Apismar5.1**

MLVVILVRLVGLNVKMNNQEKVQMLLIYGKCDRNSRQSARMYAEQYPGRYHPPHTFFIKIEQLLINHGAFSVKVV  
RNQQIRENNINEDVELQVLAYIRLNPRSSVRHVGREVGISFGLVHKILKKHKMHPYK**PDLVQH**LRPADPERRLNF  
IAWLLVQIDTKPLFLNQILWT**DE**SKFTNNGVINQNNRMWSDVNPHWAVDNRYQTVWGTNVWCGLIGGKLLGPYF  
YEENLTARRYLAFLTNVPLMLENLPLATRQTLYFQ**QD**GAPAHNAHIVRDYLNRYVEGKWLGTYGPIEWPARSPD  
ITPL**DF**FFLWGHLKTVVYADPPVNLADLKNKILVACNNLTESQIMSATNRGCLQRFQLCVDNHGANFEQFI

**Apismar5.2**

MPSYSNTELPDMHFYGLCNGNTRASQREYENRFPHRRVPAPAMFSRIHQALRQRGNFRRSLSRESVQNVDLEREI  
LDEVNRDPETSTRTLAHQFGVHHSTVWRTINREGLHPYHF\*EFMA\*RTQTINNVYSSVDGYFIMKLRIVVFSKVL  
WT**DE**STFTREGVFNINHSHHYAQENPRLVRQRFQRRFSINVVMGIIGVLI GPFLGLPRTVGGNSYLNFLQNEL  
PGLLEDLPLEVRRRMIYQ**HD**GAPPHFSRAVRQHLDETFTCWIGRGGTIPWPPRSPDLTP**MD**FFVWGYLKERVYHQ  
EVDSEAE LRQRI LQAAIEIRRVVTAGVTGRHVRE RARACL RQNGGHIEQLL
