# Supplementary material for: Diversity and evolution of mariner-like elements in aphid genomes
Source: PubMed Central journal article supplement (PMC5490172; doi:10.1186/s12864-017-3856-6), 2017-06-29
Supplement: 12864_2017_3856_MOESM3_ESM.pdf [file 12864_2017_3856_MOESM3_ESM.pdf]

**Additional file 3. Sequences classified by UPGM-VM method according to the reading sense indicated by the arrow in the circular tree. Deleted or truncated sequences are indicated by an asterisk (\*).**

| Species                          | Accession numbers                                             | Corresponding sequences |
|----------------------------------|---------------------------------------------------------------|-------------------------|
| <b>Macrosiphinimar DD34D</b>     |                                                               |                         |
| 1                                | gi984744883:140935-140721 strand-                             | *                       |
| 2                                | gi984744980:13238-14654 strand+                               | *                       |
| 3                                | gi984745316:3270-2865 strand-                                 | *                       |
| 4                                | gi984745505:879619-879165 strand-                             | *                       |
| 5                                | gi320446981 NW003383590.1 Scaffold101:202225-201649 strand -  | *                       |
| 6                                | gi320388812 NW003403215.1 Scaffold19726:243-904 strand -      | *                       |
| 7                                | gi320446984 NW003383587.1 Scaffold 98:39716-40668 strand +    | MITE1.1 sub1            |
| 8                                | gi320446985 NW003383586.1 Scaffold97:172262-173595 strand +   | Apismar1.1              |
| 10                               | Scaffold938 :36419-37755 strand-                              | Mpmar1.1                |
| 11                               | Scaffold42 :437239-438574 strand-                             |                         |
| 12                               | Scaffold26 :74179-75510 strand+                               |                         |
| 13                               | Scaffold353:292415-290211 strand -                            |                         |
| 14                               | Scaffold167:418817-420155 strand+                             |                         |
| 15                               | Scaffold425:148657-149615 strand +                            | MITE1.3                 |
| 16                               | gi984745178:34523-35477 strand+                               | *                       |
| 17                               | gi320447035 NW003383536.1 Scaffold47:642566-643516 strand +   | MITE1.1 sub1            |
| 18                               | Scaffold6:1582921..1583927 strand+                            | MITE1.3                 |
| 19                               | gi320446957 NW003383614.1 Scaffold125:833628-834589 strand -  | MITE1.1 sub1            |
| 20                               | Scaffold344:286764-288093 strand+                             | Mpmar1.1                |
| 21                               | Scaffold50:754375-755343 strand+                              | *                       |
| 22                               | gi320446934 NW003383637.1 Scaffold 148:254344-255290 strand + | MITE1.1 sub1            |
| 23                               | gi320446899 NW003383672.1 Scaffold 183:345754-346918 strand + |                         |
| 24                               | gi1006854094 LKEY01038001.1 Contig 38001:392-1605             |                         |
| 25                               | Rpmar33 (Filée et al. 2015)                                   |                         |
| 26                               | gi763991541 BBUO01005411.1 Contig06950:10342-11676            |                         |
| 27                               | gi641099433 JHQO01163363.1 ContigNC163363:6062-7386           |                         |
| 28                               | gi642862357 JJNS01041406.1 ContigNC41406:3310-4634            |                         |
| 29                               | Scaffold1103:23507-23906 strand+                              | *                       |
| 30                               | gi984745202:272244-271837 strand-                             | *                       |
| 31                               | gi984745488:452325-450979 strand-                             | Dnomar1.1               |
| 32                               | gi984745255:324638-325555 strand+                             | *                       |
| 33                               | Scaffold131:48139-48677 strand-                               | *                       |
| 34                               | gi320447046 NW003383525.1 Scaffold36 :908811-909602 strand -  | *                       |
| 35                               | gi320447034 NW003383537.1 Scaffold48:638002-638846 strand +   | *                       |
| 36                               | gi320446875 NW003383696.1 Scaffold207:537540-538487 strand -  | *                       |
| 37                               | gi984745157:267924-268872 strand+                             | *                       |
| 38                               | gi984744390:37892-38851 strand+                               | *                       |
| 39                               | gi320447089 NW003383510.1 Scaffold21:987841-988816 strand +   | *                       |
| 40                               | gi320446282 NW003384289.1 Scaffold800:146539-147106 strand -  | MITE1.1 sub2            |
| 41                               | gi320446572 NW003383999.1 Scaffold510:194743-195684 strand +  |                         |
| 42                               | gi320446653 NW003383918.1 Scaffold429:453472-454426 strand +  |                         |
| 43                               | gi320446326 NW003384245.1 Scaffold756:48163-49727 strand +    |                         |
| 44                               | gi320447005 NW003383566.1 Scaffold77:451686-452577 strand +   |                         |
| 45                               | gi320442452 NW003388040.1 Scaffold4551:1640-2495 strand +     | *                       |
| 46                               | gi320446993 NW003383578.1 Scaffold89:934560-935876 strand +   | *                       |
| 47                               | gi984745245:252450-251151 strand-                             | Apismar1.2              |
| 48                               | gi459605371 APGL01021548.1 Seq01021608:13322-14422            | Dnomar1.2               |
| 49                               | gi822390376 JHBY01085489.1 Contig85496: 109-1314              |                         |
| 50                               | gi642470880 JJNS01248885.1 ContigNC248885:1757-2877           |                         |
| 51                               | gi553813549 AYEL01086727.1 Contig347321:2028-3230             |                         |
| 52                               | gi496870061 AQHT01063015.1 Contig63076:4332-5534              |                         |
| <b>Himar-like elements DD34D</b> |                                                               |                         |

|                                    |                                                           |                                                             |            |
|------------------------------------|-----------------------------------------------------------|-------------------------------------------------------------|------------|
| 53                                 | <i>Aphis glycines</i>                                     | GQ231493                                                    |            |
| 54                                 | <i>Drosophila yakuba</i>                                  | Dromar18 (Wallau et al. 2014)                               |            |
| 55                                 | <i>Rhodnius prolixus</i>                                  | Rpmar0 (Filée et al. 2015)                                  |            |
| 56                                 | <i>Bactrocera dorsalis</i>                                | AF346541                                                    |            |
| 57                                 | <i>Diachasmimorpha longicaudata</i>                       | AY601748                                                    |            |
| 58                                 | <i>Chrysoperla plorabunda</i>                             | L06041                                                      |            |
| 59                                 | <i>Haematobia irritans</i>                                | U11642                                                      |            |
| 60                                 | <i>Mantispa pulchella</i>                                 | U11649                                                      |            |
| 61                                 | <i>Bactrocera dorsalis</i>                                | AY601743                                                    |            |
| <b>Maibmar-like elements DD34D</b> |                                                           |                                                             |            |
| 62                                 | <i>Cancer pagurus</i>                                     | AJ507245                                                    |            |
| 63                                 | <i>Eriphia verrucosa</i>                                  | AM906106                                                    |            |
| 64                                 | <i>Thalamita possoinii</i>                                | AM906155                                                    |            |
| 65                                 | <i>Pilumnus hirtellus</i>                                 | AM906121                                                    |            |
| 66                                 | <i>Xantho hydrophilus</i>                                 | AM906156                                                    |            |
| 67                                 | <i>Maia brachidactyla</i>                                 | AJ507238                                                    |            |
| <b>Bytmar-like element DD34D</b>   |                                                           |                                                             |            |
| 68                                 | <i>Alvinella caudata</i>                                  | AJ496120                                                    |            |
| 69                                 | <i>Ventiella sulfuris</i>                                 | AJ507232                                                    |            |
| 70                                 | <i>Perisesarma bidens</i>                                 | AM906146                                                    |            |
| 71                                 | <i>Bythograea thermydron</i>                              | AJ507219                                                    |            |
| 72                                 | <i>Portunus pelagicus</i>                                 | AM906137                                                    |            |
| 73                                 | <i>Alvinella pompejana</i>                                | AJ496135                                                    |            |
| <b>Nosferatis DD34D</b>            |                                                           |                                                             |            |
| 74                                 | <i>Rhodnius prolixus</i>                                  | Rpmar13 (Filée et al. 2015)                                 |            |
| 75                                 |                                                           | Rpmar9 (Filée et al. 2015)                                  |            |
| <b>Dnomar-like element DD34D</b>   |                                                           |                                                             |            |
| 76                                 | <i>Diuraphis noxia</i>                                    | gi984735891:2467-2015 strand-                               | *          |
| 77                                 |                                                           | gi984745098:54676-56035 strand+                             | Dnomar3.1  |
| 78                                 | <i>Myzus persicae</i>                                     | Scaffold280:15925-14979 strand -                            | *          |
| 79                                 |                                                           | Scaffold220: 401477-402088 strand +                         | *          |
| <b>Hsmar2-like element DD34D</b>   |                                                           |                                                             |            |
| 80                                 | <i>Portunus pelagicus</i>                                 | AM906137                                                    |            |
| 81                                 | <i>Alvinella pompejana</i>                                | AJ496135                                                    |            |
| 82                                 | <i>Homo sapiens</i>                                       | U49974                                                      |            |
| 83                                 | <i>Lemur catta</i>                                        | AC133072                                                    |            |
| 84                                 | <i>Gorilla gorilla</i>                                    | AC145402                                                    |            |
| <b>Batmar-like element DD34D</b>   |                                                           |                                                             |            |
| 85                                 | <i>Diuraphis noxia</i>                                    | gi984745342:336477-336902 strand+                           | *          |
| 86                                 |                                                           | gi984744928:23881-24312 strand+                             | *          |
| 87                                 |                                                           | gi984745420:365693-366623 strand+                           | *          |
| 88                                 |                                                           | gi984745311:440129-439207 strand-                           | *          |
| 89                                 | <i>Acyrtosiphon pisum</i>                                 | gi320447037 NW003383534.1 Scaffold45:158750-158202 strand-  | *          |
| 90                                 |                                                           | gi320446899 NW003383672.1 Scaffold183:261886-261320 strand- | *          |
| 91                                 | <i>Diuraphis noxia</i>                                    | gi984744320:45892-45397 strand-                             | *          |
| 92                                 |                                                           | gi984744320:47738-47243 strand-                             | *          |
| 93                                 | <i>Acyrtosiphon pisum</i>                                 | gi320446184 NW003384387.1 Scaffold898 :36060-36989 strand - | *          |
| 94                                 |                                                           | gi320446473 NW003384098.1 Scaffold609:132371-133021 strand+ | *          |
| 95                                 |                                                           | gi320438813 NW003391455.1 Scaffold7966:4139-4600 strand+    | *          |
| 96                                 |                                                           | gi320446392 NW003384179.1 Scaffold690:96269-97548 strand -  | Apismar2.2 |
| 97                                 |                                                           | gi320447011 NW003383560.1 Scaffold71:493658-494941 strand + |            |
| 98                                 | gi320447000 NW003383571.1 Scaffold82:64692-64037 strand - | *                                                           |            |
| 99                                 | <i>Heliconius melpomene</i>                               | gi378865014 CAEZ01008735.1 Contig7180001235928:24625-25792  |            |
| 100                                | <i>Drosophila eugracilis</i>                              | gi449842783 AFPQ02005657.1 Contig5655:975265-976459         |            |
| 101                                | <i>Neodiprion lecontei</i>                                | gi914279877 LGIB01001307.1 Scaffold1307:12116-13443         |            |
| 102                                | <i>Lasius niger</i>                                       | gi861599989 LBMM01019009.1:53-1374                          |            |
| 103                                | <i>Diuraphis noxia</i>                                    | gi984745480:182128-183428 strand+                           | *          |
| 104                                |                                                           | gi984745116:79279-80622 strand+                             | Dnomar2.2  |
| 105                                | <i>Agrilus planipennis</i>                                | gi648140536 JENH01008607.1 Contig8616:12243-13577           |            |
| 106                                | <i>Diuraphis noxia</i>                                    | gi984745529:295648-297002 strand+                           | Dnomar2.2  |

|                                     |                                     |                                                              |            |
|-------------------------------------|-------------------------------------|--------------------------------------------------------------|------------|
| 107                                 | <i>Rhodnius prolixus</i>            | Rpmar1 (Filée et al. 2015)                                   |            |
| 108                                 | <i>Dinoponera quadricaps</i>        | gi938133368 JPHR01007292.1 Scaffold1145:2209123415           |            |
| 109                                 | <i>Copidosoma floridanum</i>        | gi619889135 JBOX01069944.1 Contig69949:1149212815            |            |
| 110                                 | <i>Ceratitits capitata</i>          | gi488305875 NW004523814.1 Contig13099:32902-34140            |            |
| 111                                 | <i>Drosophila ficusphila</i>        | Dromar8 (Wallau et al. 2014)                                 |            |
| 112                                 | <i>Acyrtosiphon pisum</i>           | gi320445628 NW003384943.1 Scaffold1454:8232- 8961 strand -   | *          |
| 113                                 |                                     | gi320445628 NW003384943.1 Scaffold1454:3454-4361 strand-     | MITE2.1    |
| 114                                 |                                     | gi320447015 NW003383556.1 Scaffold67:738385-739292 strand-   |            |
| 115                                 |                                     | gi320445203 NW003385294.1 Scaffold1805:8796-7866 strand-     |            |
| 116                                 |                                     | gi320446728 NW003383843.1 Scaffold354:173658-174753 strand - | *          |
| 117                                 |                                     | gi320446952 NW003383619.1 Scaffold130:212179-213501 strand - | Apismar2.1 |
| 118                                 | <i>Myzus persicae</i>               | Scaffold544:202614-203522 strand+                            | MITE2.2    |
| 119                                 |                                     | Scaffold166:292461-293374 strand+                            |            |
| 120                                 |                                     | Scaffold6:1479795-1480706 strand+                            |            |
| 121                                 | <i>Diuraphis noxia</i>              | gi984744707:110647-111912 strand+                            | Dnomar2.1  |
| 122                                 |                                     | gi984744972:124915-123590 strand-                            |            |
| 123                                 | <i>Acyrtosiphon pisum</i>           | gi320446088 NW003384483.1 Scaffold994:76058-76816 strand+    | *          |
| 124                                 | <i>Blattella germanica</i>          | gi692674178 JPZV01249368.1 ContigNC249368:8211803            |            |
| 125                                 | <i>Trabutina mannipara</i>          | gi1044319939 FKYK01006678.1 :1-1114                          |            |
| 126                                 | <i>Camponotus floridanus</i>        | gi304581076 AEAB01024585.1 Contig622:1601-2726               |            |
| 127                                 | <i>Trionymus perrisii</i>           | gi1010807036 FIZV01000272.1 :504-1644                        |            |
| 128                                 | <i>Trachymyrmex septentrionalis</i> | gi1006956206 LKEZ01022017.1 Contig22017:3294-4437            |            |
| 129                                 | <i>Homalodisca vitripennis</i>      | gi642782498 JJNS01106073.1 ContigNC106073:3898-5039          |            |
| 130                                 | <i>Rhinolophus ferrumequinum</i>    | AC157888                                                     |            |
| 131                                 | <i>Wasmannia auropunctata</i>       | gi780611046 XM011690486.1                                    |            |
| 132                                 | <i>Rhodnius prolixus</i>            | Rpmar26 (Filée et al. 2015)                                  |            |
| 133                                 | <i>Carollia perspicillata</i>       | AC148202                                                     |            |
| <b>Pacmar-like element DD34D</b>    |                                     |                                                              |            |
| 134                                 | <i>Pachygrapsus marmoratus</i>      | AM231069                                                     |            |
| 135                                 |                                     | AM231072                                                     |            |
| 136                                 | <i>Portunus granulatus</i>          | AM906131                                                     |            |
| 137                                 | <i>Pachygrapsus marmoratus</i>      | AM983536                                                     |            |
| 138                                 | <i>Portunus granulatus</i>          | AM906134                                                     |            |
| 139                                 |                                     | AM906132                                                     |            |
| 140                                 | <i>Thalamita possoinii</i>          | AM906151                                                     |            |
| 141                                 | <i>Paromola bathyalis</i>           | AM906119                                                     |            |
| 142                                 | <i>Perisesarma bidens</i>           | AM906150                                                     |            |
| 143                                 | <i>Atelecyclus undecimdentatus</i>  | AM906092                                                     |            |
| <b>Other mariner elements DD34D</b> |                                     |                                                              |            |
| 144                                 | <i>Papilio xuthus</i>               | AB055185                                                     |            |
| 145                                 | <i>Attacus atlas</i>                | AB006464                                                     |            |
| 146                                 | <i>Hyalophora cecropia</i>          | M63844                                                       |            |
| 147                                 | <i>Bombyx mori</i>                  | D88671                                                       |            |
| 148                                 | <i>Antheraea yamamai</i>            | AB247378                                                     |            |
| 149                                 | <i>Antheraea mylitta</i>            | AF126011                                                     |            |
| 150                                 | <i>Homo sapiens</i>                 | EF517118                                                     |            |
| 151                                 | <i>Apis mellifera</i>               | AY155490                                                     |            |
| 152                                 | <i>Forficula auricularia</i>        | AY155492                                                     |            |
| 153                                 | <i>Ceratitits capitata</i>          | U76903                                                       |            |
| 154                                 | <i>Caenorhabditis elegans</i>       | U10438                                                       |            |
| 155                                 | <i>Meloidogyne chiwoodi</i>         | AJ437557                                                     |            |
| 156                                 | <i>Caenorhabditis briggsae</i>      | AC099767                                                     |            |
| 157                                 | <i>Solenopsis invicta</i>           | AF518170                                                     |            |
| 158                                 | <i>Solenopsis saevissima</i>        | AF518177                                                     |            |
| 159                                 | <i>Myrmica ruginodis</i>            | AY652423                                                     |            |
| 160                                 | <i>Bombus terrestris</i>            | AJ312712                                                     |            |
| 161                                 | <i>Drosophila mauritiana</i>        | M14653                                                       |            |
| 162                                 |                                     | X78906                                                       |            |
| 163                                 | <i>Drosophila simulans</i>          | X89927                                                       |            |
| 164                                 | <i>Mamestra brassicae</i>           | AF465247                                                     |            |
| 165                                 | <i>Messor bouvieri</i>              | AJ781769                                                     |            |

|                                  |                                                             |                                                              |                                                   |   |
|----------------------------------|-------------------------------------------------------------|--------------------------------------------------------------|---------------------------------------------------|---|
| 166                              | <i>Mayetiola destructor</i>                                 | gi30778846 AEGA01027875.1                                    |                                                   |   |
| 167                              |                                                             | U24436                                                       |                                                   |   |
| 168                              | <i>Rhynchosciara sp.</i>                                    | GU442128                                                     |                                                   |   |
| <b>Crmar2-like element DD41D</b> |                                                             |                                                              |                                                   |   |
| 169                              | <i>Acyrtosiphon pisum</i>                                   | gi320446057 NW003384514.1 Scaffold1025:1012-1344 strand+     | *                                                 |   |
| 170                              |                                                             | gi320446057 NW003384514.1 Scaffold1025:2902-3244 strand+     | *                                                 |   |
| 171                              |                                                             | gi320401144 NW003399120.1 Scaffold15631:349-1 strand-        | MITE4.1 sub1                                      |   |
| 172                              |                                                             | gi320447076 NW003383518.1 Scaffold29:1329370-1329000 strand- |                                                   |   |
| 173                              |                                                             | gi320446843 NW003383728.1 Scaffold239:535418-535797 strand+  |                                                   |   |
| 174                              |                                                             | gi320446434 NW003384137.1 Scaffold648:49392-49775 strand-    |                                                   |   |
| 175                              |                                                             | gi320446106 NW003384465.1 Scaffold976:179217-179591 strand+  |                                                   |   |
| 176                              |                                                             | gi320446648 NW003383923.1 Scaffold434:173770-174148 strand+  |                                                   |   |
| 177                              |                                                             | gi320446083 NW003384488.1 Scaffold999:5967-6345 strand+      |                                                   |   |
| 178                              |                                                             | gi320447199 NW003383491.1 Scaffold2:2053341-2053729 strand+  |                                                   |   |
| 179                              |                                                             | gi320447197 NW003383492.1 Scaffold3:641055-641464 strand -   |                                                   | * |
| 180                              |                                                             | gi320446904 NW003383667.1 Scaffold178:3884-4294 strand -     |                                                   | * |
| 181                              |                                                             | gi320441128 NW003389140.1 Scaffold5651:1032-1552 strand -    | *                                                 |   |
| 182                              | gi320447041 NW003383530.1 Scaffold41:488837-490191 strand - | Apismar4.1                                                   |                                                   |   |
| 183                              | <i>Diuraphis noxia</i>                                      | gi984744291:33825-34544 strand+                              | *                                                 |   |
| 184                              |                                                             | gi984744522:27562-28176 strand+                              | *                                                 |   |
| 185                              |                                                             | gi984745358:548730-549307 strand+                            | MITE4.2                                           |   |
| 186                              |                                                             | gi984745382:435077-434500 strand-                            |                                                   |   |
| 187                              | <i>Acyrtosiphon pisum</i>                                   | gi320447027 NW003383544.1 Scaffold55:451821-452338 strand+   | *                                                 |   |
| 188                              |                                                             | gi320446929 NW003383642.1 Scaffold153:555302-554950 strand-  | MITE4.1 sub2                                      |   |
| 189                              |                                                             | gi320446959 NW003383612.1 Scaffold123:513503-513873 strand+  |                                                   |   |
| 190                              |                                                             | gi320446812 NW003383759.1 Scaffold270:349975-349604 strand-  |                                                   |   |
| 191                              |                                                             | gi320445944 NW003384627.1 Scaffold1138:18647-18271 strand-   |                                                   |   |
| 192                              | <i>Locusta migratoria</i>                                   | AVCP010119604.1                                              |                                                   |   |
| 193                              | <i>Mesobuthus martensii</i>                                 | gi553824729 AYEL01075810.1 Contig333646:1103812150           |                                                   |   |
| 194                              | <i>Stegodyphus mimosarum</i>                                | gi602493518 AZAQ01086514.1 Contig86514:26900-28235           |                                                   |   |
| 195                              | <i>Acyrtosiphon pisum</i>                                   | gi320446734 NW003383837.1 Scaffold348:294674-294127 strand-  | *                                                 |   |
| 196                              |                                                             | gi320445699 NW003384872.1 Scaffold1383:15032-14708 strand-   | *                                                 |   |
| 197                              |                                                             | gi320447104 NW003383505.1 Scaffold16 :729100-731500 strand+  | Apismar4.3                                        |   |
| 198                              | <i>Diuraphis noxia</i>                                      | gi984745081:151016-151527 strand+                            | *                                                 |   |
| 199                              |                                                             | gi984745384:382222-382755 strand+                            | *                                                 |   |
| 200                              |                                                             | gi984745429:267344-266809 strand-                            | *                                                 |   |
| 201                              |                                                             | gi984745389:349961-349421 strand-                            | *                                                 |   |
| 202                              |                                                             | gi984745380:533248-533974 strand+                            | *                                                 |   |
| 203                              |                                                             | gi984745519:793804-794330 strand+                            | *                                                 |   |
| 204                              |                                                             | gi984745503:728303-727753 strand-                            | *                                                 |   |
| 205                              |                                                             | <i>Nilaparvata lugens</i>                                    | gi688034042 AOSB01116314.1 Scaffold930:1140012616 |   |
| 206                              | <i>Heliconius melpomene</i>                                 | KU514436.1 GI:974707777 32163-33486                          |                                                   |   |
| 207                              | <i>Acromyrmex echinator</i>                                 | XM011050935.1                                                |                                                   |   |
| 208                              | <i>Acyrtosiphon pisum</i>                                   | gi320446279 NW003384292.1 Scaffold803:93845-94145 strand+    | *                                                 |   |
| 209                              |                                                             | gi320445889 NW003384682.1 Scaffold1193:81099-81559 strand -  | *                                                 |   |
| 210                              |                                                             | gi320446954 NW003383617.1 Scaffold128:616437-616899 strand-  | *                                                 |   |
| 211                              |                                                             | gi320447044 NW003383527.1 Scaffold38:870577-871352 strand-   | *                                                 |   |
| 212                              |                                                             | gi320446184 NW003384387.1 Scaffold898:33860-34319 strand+    | *                                                 |   |
| 213                              |                                                             | gi320447097 NW003383508.1 Scaffold19:246121-246683 strand+   | *                                                 |   |
| 214                              |                                                             | gi320446974 NW003383597.1 Scaffold108:252404-252965 strand-  | *                                                 |   |
| 215                              |                                                             | gi320447085 NW003383512.1 Scaffold23:1752408-1753706 strand- | Apismar4.2                                        |   |
| 216                              |                                                             | gi320447044 NW003383527.1 Scaffold38:871366-871812 strand+   | *                                                 |   |
| 217                              |                                                             | <i>Atta cephalotes</i>                                       | gi295962919 ADTU01003898.1 Contig03898:64257703   |   |
| 218                              | <i>Trachymyrmex cornetzi</i>                                | gi1006767341 LKEY01058653.1 Contig58653:2926-4236            |                                                   |   |
| 219                              | <i>Atta colombica</i>                                       | gi1006787365 LKEW01025605.1 Contig25605:1490716198           |                                                   |   |
| 220                              | <i>Danaus plexippus</i>                                     | gi357604284 AGBW01012371.1 :21719-22917                      |                                                   |   |
| 221                              | <i>Dufourea novaeangliae</i>                                | gi919891211 LGHO01003380.1 Contig3380:23632-24843            |                                                   |   |
| 222                              | <i>Harpegnathos saltator</i>                                | gi304616639 AEAC01015863.1 Contig6619:7536976586             |                                                   |   |
| 223                              | <i>Anoplophora glabripennis</i>                             | gi496927062 AQHT01044136.1 Contig44173:546-1789              |                                                   |   |
| 224                              | <i>Anastrepha suspensa</i>                                  | AY034629                                                     |                                                   |   |
| 225                              |                                                             | AY034630                                                     |                                                   |   |
| 226                              | <i>Operophtera brumata</i>                                  | gi914552887 JTDY01008752.1 2357-3647                         |                                                   |   |

|                                   |                                    |                                                              |                                     |   |
|-----------------------------------|------------------------------------|--------------------------------------------------------------|-------------------------------------|---|
| 227                               | <i>Ceratitis rosa</i>              | AY034623                                                     |                                     |   |
| 228                               | <i>Homalodisca vitripennis</i>     | gi642494493 JJNS01240973.1 ContigNC240973:3989-5223          |                                     |   |
| 229                               | <i>Anoplophora glabripennis</i>    | gi496912294 AQHT01049420.1 Contig49462:67688047              |                                     |   |
| 230                               | <i>Dendroctonus ponderosae</i>     | gi459588353 APGL01038566.1                                   |                                     |   |
| 231                               | <i>Acyrtosiphon pisum</i>          | gi320446058 NW003384513.1 Scaffold1024:28892-29972 strand-   | *                                   |   |
| 232                               |                                    | gi320446789 NW003383782.1 Scaffold293:337514-338606 strand + | *                                   |   |
| 233                               | <i>Metaseiulus occidentalis</i>    | gi391326941 XM003737920.1                                    |                                     |   |
| <b>LTIR-like element DD40-41D</b> |                                    |                                                              |                                     |   |
| 234                               | <i>Acyrtosiphon pisum</i>          | gi320446742 NW003383829.1 Scaffold340:1803-2145 strand+      | *                                   |   |
| 235                               |                                    | gi320446952 NW003383619.1 Scaffold130:17385-18186 strand+    | *                                   |   |
| 236                               |                                    | gi320442315 NW003388177.1 Scaffold4688:7007-6080 strand-     | *                                   |   |
| 237                               |                                    | gi320446920 NW003383651.1 Scaffold162:358972-359636 strand+  | *                                   |   |
| 238                               |                                    | gi320447020 NW003383551.1 Scaffold62:504081-503547 strand-   | *                                   |   |
| 239                               |                                    | gi320447044 NW003383527.1 Scaffold38:494414-493847 strand-   | *                                   |   |
| 240                               |                                    | gi320447038 NW003383533.1 Scaffold44:245172-244580 strand-   | *                                   |   |
| 241                               |                                    | gi320442393 NW003388099.1 Scaffold4610:542-1295 strand+      | *                                   |   |
| 242                               |                                    | gi320433456 NW003396117.1 Scaffold12628:816-1 strand-        | *                                   |   |
| 243                               |                                    | gi320446328 NW003384243.1 Scaffold754:22810-24151 strand+    | *                                   |   |
| 244                               |                                    | gi320446852 NW003383719.1 Scaffold230:461388-461756 strand+  | *                                   |   |
| 245                               |                                    | gi320447106 NW003383503.1 Scaffold14:910161-909675 strand-   | *                                   |   |
| 246                               |                                    | gi320447031 NW003383540.1 Scaffold51:481283-479084 strand-   | *                                   |   |
| 247                               |                                    | gi320446462 NW003384109.1 Scaffold620:170760-168538 strand-  | *                                   |   |
| 248                               |                                    | gi320447015 NW003383556.1 Scaffold67:301784-299478 strand-   | Apismar5.1                          |   |
| 249                               |                                    | <i>Myzus persicae</i>                                        | Scaffold228: 352709..353122 strand+ | * |
| 250                               |                                    |                                                              | Scaffold16:1450072-1450945 strand+  | * |
| 251                               |                                    |                                                              | Scaffold176:395279-395722 strand+   | * |
| 252                               | Scaffold10:1542469-1543323 strand- |                                                              | *                                   |   |
| 253                               | <i>Diuraphis noxia</i>             | gi984745065:239246-238443 strand-                            | MITE5.1                             |   |
| 254                               |                                    | gi984745517:765990-765175 strand-                            |                                     |   |
| 255                               |                                    | gi984745390:259040-259829 strand+                            |                                     |   |
| 256                               |                                    | gi984745032:193491-194325 strand+                            | *                                   |   |
| 257                               |                                    | gi984745175:253583-254179 strand+                            | *                                   |   |
| 258                               |                                    | gi984745400:243420-244241 strand+                            | MITE5.1                             |   |
| 259                               | gi984745050:86317-85518 strand-    |                                                              |                                     |   |
| 260                               | gi984745081:249492-250419 strand+  | *                                                            |                                     |   |
| 261                               | <i>Acyrtosiphon pisum</i>          | gi320446972 NW003383599.1 Scaffold110:354919-355343 strand+  | *                                   |   |
| 262                               |                                    | gi320447020 NW003383551.1 Scaffold62:503547-504119 strand+   | *                                   |   |
| 263                               |                                    | gi320446800 NW003383771.1 Scaffold282:207301-208570 strand+  | *                                   |   |
| 264                               |                                    | gi320446154 NW003384417.1 Scaffold928:21356-19996 strand-    | *                                   |   |
| 265                               |                                    | gi320446987 NW003383584.1 Scaffold95:302694-301750 strand-   | *                                   |   |
| 266                               |                                    | gi320447105 NW003383504.1 Scaffold15:1038009-1036576 strand- | *                                   |   |
| 267                               | <i>Diuraphis noxia</i>             | gi984745508:982719-984070 strand+                            | *                                   |   |
| 268                               | <i>Acyrtosiphon pisum</i>          | gi320447008 NW003383563.1 Scaffold74:94584-96017 strand+     | *                                   |   |
| 269                               |                                    | gi320442315 NW003388177.1 Scaffold4688:6080-7007 strand+     | *                                   |   |
| 270                               |                                    | gi320446319 NW003384252.1 Scaffold763:18048-18455 strand+    | *                                   |   |
| 271                               |                                    | gi320447082 NW003383514.1 Scaffold25:979065-978002 strand-   | *                                   |   |
| 272                               |                                    | gi320446163 NW003384408.1 Scaffold919:2730-3812 strand-      | *                                   |   |
| 273                               |                                    | gi320447077 NW003383517.1 Scaffold28:658930-658046 strand-   | *                                   |   |
| 274                               |                                    | gi320447191 NW003383495.1 Scaffold6:867979-866906 strand-    | *                                   |   |
| 275                               |                                    | <i>Myzus persicae</i>                                        | Scaffold1040:29624-30705 strand+    | * |
| 276                               | Scaffold1981:5634-7149 strand+     |                                                              | *                                   |   |
| 277                               | <i>Acyrtosiphon pisum</i>          | gi320446879 NW003383692.1 Scaffold203:311633-311055 strand-  | *                                   |   |
| 278                               |                                    | gi320447177 NW003383497.1 Scaffold8:947336-948127 strand+    | *                                   |   |
| 279                               |                                    | gi320446579 NW003383992.1 Scaffold503:316494-315441 strand-  | *                                   |   |
| 280                               | <i>Diuraphis noxia</i>             | gi984745469:593111-591544 strand-                            | *                                   |   |
| 281                               | <i>Acyrtosiphon pisum</i>          | gi320447082 NW003383514.1 Scaffold25:163596-162726 strand-   | *                                   |   |
| 282                               |                                    | gi320434094 NW003395907.1 Scaffold12418:13-883 strand+       | *                                   |   |
| 283                               |                                    | gi320392825 NW003401900.1 Scaffold18411:6357-5063 strand-    | *                                   |   |
| 284                               | <i>Bombus terrestris</i>           | gi339751187 AELG01000709: 6387911-6385650                    |                                     |   |
| 285                               | <i>Nasonia vitripennis</i>         | gi154053393:26728-27797                                      |                                     |   |
| 286                               | <i>Harpegnathos saltator</i>       | NW011646526.1 Scaffold1231:24830-28107                       |                                     |   |
| 287                               | <i>Pogonomyrmex barbatus</i>       | NW011933482.1 Scaffold7180000350099:45895-49565              |                                     |   |

|                               |                                 |                                                             |              |
|-------------------------------|---------------------------------|-------------------------------------------------------------|--------------|
| 288                           | <i>Calycoptis cecrops</i>       | LUGF01035226.1                                              |              |
| 289                           | <i>Cimex lectularius</i>        | JRLE01000220.1 Scaffold310843                               |              |
| 290                           | <i>Rhodnius prolixus</i>        | KQ034065 Scaffold9:2936024-2933697                          |              |
| 291                           | <i>Anoplophora glabripennis</i> | gi496979286 AQHT01025496.1 Contig25506:11686-12762          |              |
| 292                           | <i>Homalodisca vitripennis</i>  | KK962044.1 Scaffold551:1019188-1021387                      |              |
| 293                           | <i>Megachile rotundata</i>      | gi383080544 Scaffold0130:560690-562464                      |              |
| 294                           | <i>Acyrtosiphon pisum</i>       | gi320447045 NW003383526.1 Scaffold37:902476-902066 strand+  | MITE5.2 sub1 |
| 295                           |                                 | gi320446511 NW003384060.1 Scaffold571:438535-438949 strand+ |              |
| 296                           |                                 | gi320446471 NW003384100.1 Scaffold611:61351-61779 strand+   |              |
| 297                           |                                 | gi320446667 NW003383904.1 Scaffold415:160458-160887 strand+ | MITE5.2 sub2 |
| 298                           |                                 | gi320446129 NW003384442.1 Scaffold953:162133-162549 strand+ |              |
| 299                           |                                 | gi320446884 NW003383687.1 Scaffold198:591126-591545 strand+ |              |
| 300                           |                                 | gi320446815 NW003383756.1 Scaffold267:153990-154430 strand+ |              |
| 301                           |                                 | gi320447083 NW003383513.1 Scaffold24:949317-949750 strand+  | *            |
| 302                           |                                 | gi320447001 NW003383570.1 Scaffold81:754854-757276 strand+  | Apismar5.2   |
| 303                           |                                 | gi320446306 NW003384265.1 Scaffold776:57772-58831 strand+   | *            |
| 304                           |                                 | gi320446984 NW003383587.1 Scaffold98:28691-29172 strand+    | *            |
| 305                           |                                 | gi320446449 NW003384122.1 Scaffold633:131583-130926 strand- | *            |
| 306                           |                                 | gi320446999 NW003383572.1 Scaffold83:210237-208812 strand-  | *            |
| 307                           |                                 | gi320446763 NW003383808.1 Scaffold319:416807-419008 strand+ | *            |
| <b>maT DD37D</b>              |                                 |                                                             |              |
| 308                           | <i>Caenorhabditis elegans</i>   | AF038612                                                    |              |
| 309                           |                                 | Z83129                                                      |              |
| 310                           | <i>Caenorhabditis briggsae</i>  | AC084524                                                    |              |
| 311                           | <i>Bombyx mori</i>              | U43131                                                      |              |
| 312                           | <i>Anopheles gambiae</i>        | AAAB01008975                                                |              |
| <b>Outgroup TLE and IS630</b> |                                 |                                                             |              |
| 313                           | <i>Fusarium oxysporum</i>       | AF282722                                                    |              |
| 314                           | <i>Caenorhabditis briggsae</i>  | M64308                                                      |              |
| 315                           | <i>Drosophila virilis</i>       | CH940657                                                    |              |
| 316                           | <i>Salmo salar</i>              | AJ249090                                                    |              |
| 317                           | <i>Anopheles gambiae</i>        | U89802                                                      |              |
| 318                           | <i>Aedes aegypti</i>            | AF208675                                                    |              |
| 319                           | <i>Caenorhabditis elegans</i>   | M77697                                                      |              |
| 320                           | <i>Aedes atropalpus</i>         | AY038027                                                    |              |
| 321                           | <i>Fusarium oxysporum</i>       | AF076632                                                    |              |
| 322                           | <i>Fusarium solani</i>          | AF443562                                                    |              |
| 323                           | <i>Fusarium oxysporum</i>       | AF076631                                                    |              |
| 324                           |                                 | AJ608703                                                    |              |
| 325                           | <i>Aspergillus niger</i>        | U58946                                                      |              |
| 326                           | <i>Sinorhizobium meliloti</i>   | AF143444                                                    |              |
| 327                           | <i>Pseudomonas sp.</i>          | U15298.1                                                    |              |
| 328                           | <i>Catharanthus roseus</i>      | DQ852611                                                    |              |
| 329                           | <i>Salmonella typhimurium</i>   | M58505                                                      |              |
