# Supplementary material for: Diversity and evolution of mariner-like elements in aphid genomes
Source: BMC Genomics. 2017 Jun 29;18:494. doi: 10.1186/s12864-017-3856-6 (PMC5490172; doi:10.1186/s12864-017-3856-6)
Supplement: Supplementary file 5 — Pairwise divergence matrix between amino acid lineages. Fifteen complete sequences have been aligned using Aliview, The alignment was then transferred in GENEDOC software [65] to obtain the identity percentage. Sequences name: Apismar: elements from Acyrthosiphon pisum, Dnomar: elements from Diuraphis noxia and Mpmar: elements from Myzus persicae. (PDF 354 kb) [file 12864_2017_3856_MOESM5_ESM.pdf]

**Additional file 5. Pairwise divergence matrix between amino acid lineages.** Fifteen complete sequences have been aligned using Aliview. The alignment was then transferred in GENEDOC software [64] to obtain the identity percentage.

Sequences name: *Apismar*: elements from *Acyrtosiphon pisum*, *Dnomar*: elements from *Diuraphis noxia* and *Mpmar*: elements from *Myzus persicae*.

[illegible]
